# Supplementary material for: Unraveling Morphophysiological and Biochemical Responses of Triticum aestivum L. to Extreme pH: Coordinated Actions of Antioxidant Defense and Glyoxalase Systems
Source: PubMed Central journal article supplement (PMC6359243; doi:10.3390/plants8010024), 2019-01-18
Supplement: plants-08-00024-s001.pdf [file plants-08-00024-s001.pdf]

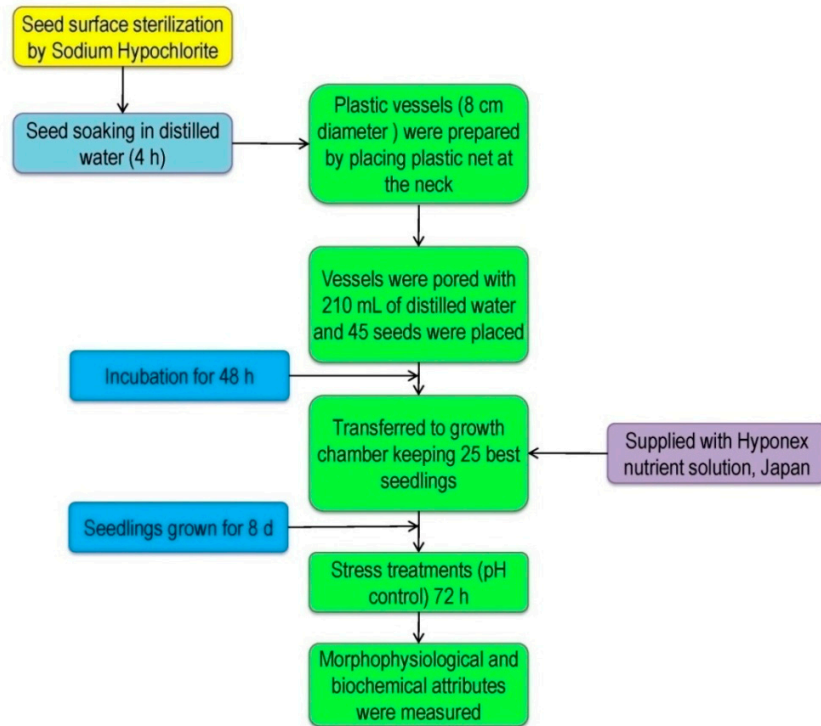

**Figure S1.** Work flow scheme of the conducted experiment.
